# Supplementary material
Source: publisher figshare collection journal article supplement (https://diabetesjournals.figshare.com/ndownloader/files/24530441)
Supplement: Supplementary file 1 [file 24530441]

## Sheet: Legend
Name	Description
UniProtID	protin UniProt ID
Name	full protein name
Protein origin	protein origin, which could be our replicated results or type 2 diabetes associated proteins extracted from UniProt
Gene	gene name of the protein
Network	whether the protein is part of the STRING netwok connecting replicated proteins to UniProt reported proteins and their immediate interaction network
TDL	targer development level infomration from PHAROS
DTO.Class	Drug Target Ontology category as per http://drugtargetontology.org/ and paper https://doi.org/10.1186/s13326-017-0161-x
Panther	protein analysis through evolutionary relationships is a protein classification scheme https://en.wikipedia.org/wiki/PANTHER and https://www.ncbi.nlm.nih.gov/pmc/articles/PMC5210595
Subcell_Location	subcellar location of the protein
GO.Experimental.MF/BP.Leaf.Terms	Gene Ontology Molecular Function (MF) or Biological Process (BP) Leaf term, aka GO terms for which no child term exists, it is an indication of “experimental nodes”. See also https://www.ncbi.nlm.nih.gov/pmc/articles/PMC2944202/
OMIM.Phenotype(s)	data from OMIM on phenotypes related to that protein
JAX/MGI.Human.Ortholog.Phenotype(s)	data from JAX/MGI on mouse phenotype related to that protein
IMPC.Ortholog.Phenotype(s)	data from IMPC on mouse phenotype related to that protein
GWAS.Phenotype(s)	data from GWAS catalog
Pathways	pathways obtained from KEGG and several other resources (Reactome, PathwayCommons, WikiPathways, UniProt, BioCyc, MetaCyc)
DISEASES	disease association obtained from the diseases platform

## Sheet: Table S5
Supplementary Table S5: Results of the data analytics of replicated proteins
UniProtID	Name	Protein origin	Gene	Network	TDL	DTO Class	Panther	Subcell_Location	GO Experimental MF/BP Leaf Terms	OMIM Phenotype(s)	JAX/MGI Human Ortholog Phenotype(s)	IMPC Ortholog Phenotype(s)	GWAS Phenotype(s)	Pathways	DISEASES
P35475	Alpha-L-iduronidase	Prevalent T2D	IDUA	NotT2DNet	Tbio	Glycosidase	PC00110:glycosidase|PC00121:hydrolase	Lysosome| Vesicles	GO:0003940|F:L-iduronidase activity|IDA; GO:0030209|P:dermatan sulfate catabolic process|IDA; GO:0030211|P:heparin catabolic process|IMP	MIM Number: 252800; Phenotype: Mucopolysaccharidosis Ih, 607014 (3); Mucopolysaccharidosis Is, 607016 (3); Mucopolysaccharidosis Ih/s, 607015 (3)	MP:0005367:renal/urinary sys_phen|MP:0005390:skeleton phenotype|MP:0005387:immune sys_phen|MP:0005391:vision/eye phenotype|MP:0003631:nervous sys_phen|MP:0005377:hearing/vestibular/ear phenotype|MP:0005371:limbs/digits/tail phenotype|MP:0010768:mortality/aging|MP:0005397:hematopoietic sys_phen|MP:0005385:c-v sys_phen|MP:0005386:behavior/neurological phenotype|MP:0005370:liver/biliary sys_phen|MP:…		Bone mineral density (http://www.ebi.ac.uk/efo/EFO_0003923):5e-12|Blood protein levels (http://www.ebi.ac.uk/efo/EFO_0007937):3e-44|Blood protein levels (http://www.ebi.ac.uk/efo/EFO_0007937):4e-17|Blood protein levels (http://www.ebi.ac.uk/efo/EFO_0007937):7e-148|Heel bone mineral density (http://www.ebi.ac.uk/efo/EFO_0009270):1e-19|Heel bone mineral density (http://www.ebi.ac.uk/efo/EFO_0009270…	KEGG:Lysosome|KEGG:Metabolic pathways|KEGG:Glycosaminoglycan degradation|PathC: humancyc:dermatan sulfate degradation (metazoa)|RxT:CS/DS degradation|RxT:Chondroitin sulfate/dermatan sulfate metabolism|RxT:Disease|RxT:Diseases of carbohydrate metabolism|RxT:Diseases of metabolism|RxT:Glycosaminoglycan metabolism|RxT:HS-GAG degradation|RxT:Heparan sulfate/heparin (HS-GAG) metabolism|RxT:MPS I - Hu…	Mucopolysaccharidosis (ZScore: 8.314)|Glycogen storage disease IXc (ZScore: 3.991)|Umbilical hernia (ZScore: 3.838)
Q03154	Aminoacylase-1	Prevalent and incident T2D	ACY1	T2DNet	Tbio			Cytosol| Vesicles		MIM Number: 104620; Phenotype: Aminoacylase 1 deficiency, 609924 (3)				KEGG:2-Oxocarboxylic acid metabolism|KEGG:Metabolic pathways|KEGG:Biosynthesis of amino acids|KEGG:Arginine biosynthesis|RxT:Aflatoxin activation and detoxification|RxT:Biological oxidations|RxT:Defective ACY1 causes encephalopathy|RxT:Disease|RxT:Diseases of metabolism|RxT:Metabolic disorders of biological oxidation enzymes|RxT:Metabolism|W_P:Urea cycle and metabolism of amino groups	Orotic aciduria (ZScore: 3.570)|Biotinidase deficiency (ZScore: 3.445)|Greig cephalopolysyndactyly syndrome (ZScore: 3.071)
P10619	Lysosomal protective protein	Prevalent T2D	CTSA	T2DNet	Tchem	Serine protease	PC00203:serine protease|PC00190:protease|PC00121:hydrolase	Vesicles	GO:1904715|P:negative regulation of chaperone-mediated autophagy|IGI	MIM Number: 613111; Phenotype: Galactosialidosis, 256540 (3)	MP:0005387:immune sys_phen|MP:0005367:renal/urinary sys_phen|MP:0010768:mortality/aging|MP:0005397:hematopoietic sys_phen|MP:0005385:c-v sys_phen|MP:0005370:liver/biliary sys_phen|MP:0005388:respiratory sys_phen|MP:0005386:behavior/neurological phenotype|MP:0005384:cel_phen|MP:0005376:homeostasis/metabolism phenotype|MP:0005382:craniofacial phenotype|MP:0010771:integument phenotype|MP:0005378:gro…			KEGG:Renin-angiotensin system|KEGG:Lysosome|RxT:Adaptive Immune System|RxT:Asparagine N-linked glycosylation|RxT:Biosynthesis of the N-glycan precursor (dolichol lipid-linked oligosaccharide, LLO) and transfer to a nascent protein|RxT:Defective NEU1 causes sialidosis|RxT:Disease|RxT:Diseases associated with glycosylation precursor biosynthesis|RxT:Diseases of glycosylation|RxT:Glycosphingolipid m…	Lysosomal storage disease (ZScore: 5.271)|Autosomal dominant nonsyndromic deafness 69 (ZScore: 3.935)|Congenital hereditary endothelial dystrophy of cornea (ZScore: 3.899)|Leber congenital amaurosis (ZScore: 3.611)|Glaucoma (ZScore: 3.499)
Q9UBR2	Cathepsin Z	Prevalent T2D	CTSZ	T2DNet	Tchem	Cysteine protease	PC00191:protease inhibitor|PC00081:cysteine protease|PC00190:protease|PC00121:hydrolase	Vesicles	GO:0010757|P:negative regulation of plasminogen activation|IMP	MIM Number: 603169			Mean platelet volume (http://www.ebi.ac.uk/efo/EFO_0004584):7e-06|Mean platelet volume (http://www.ebi.ac.uk/efo/EFO_0004584):1e-09|Blood protein levels (http://www.ebi.ac.uk/efo/EFO_0007937):3e-76|Mean platelet volume (http://www.ebi.ac.uk/efo/EFO_0004584):4e-34|Platelet distribution width (http://www.ebi.ac.uk/efo/EFO_0007984):1e-63|Platelet distribution width (http://www.ebi.ac.uk/efo/EFO_0007…	KEGG:Lysosome|KEGG:Apoptosis|RxT:Asparagine N-linked glycosylation|RxT:COPII-mediated vesicle transport|RxT:Cargo concentration in the ER|RxT:ER to Golgi Anterograde Transport|RxT:Immune System|RxT:Innate Immune System|RxT:Lysosome Vesicle Biogenesis|RxT:Membrane Trafficking|RxT:Metabolism of Angiotensinogen to Angiotensins|RxT:Metabolism of proteins|RxT:Neutrophil degranulation|RxT:Peptide hormo…
P04114	Apolipoprotein B-100	Prevalent T2D	APOB	T2DNet	Tchem			Vesicles| Cytosol	GO:0008201|F:heparin binding|IDA; GO:0035473|F:lipase binding|IPI; GO:0050750|F:low-density lipoprotein particle receptor binding|IMP; GO:0042632|P:cholesterol homeostasis|IMP; GO:0034383|P:low-density lipoprotein particle clearance|IMP; GO:0034374|P:low-density lipoprotein particle remodeling|IMP; GO:0010886|P:positive regulation of cholesterol storage|IDA; GO:0010744|P:positive regulation of ma…	MIM Number: 107730; Phenotype: Hypobetalipoproteinemia, 615558 (3); Hypercholesterolemia, due to ligand-defective apo B, 144010 (3)	MP:0005385:c-v sys_phen|MP:0005389:reproductive sys_phen|MP:0010768:mortality/aging|MP:0005370:liver/biliary sys_phen|MP:0005380:embryo phenotype|MP:0003631:nervous sys_phen|MP:0005378:growth/size/body region phenotype|MP:0005376:homeostasis/metabolism phenotype|MP:0005384:cel_phen		Educational attainment (years of education) (http://www.ebi.ac.uk/efo/EFO_0004784):2e-09|LDL cholesterol (http://www.ebi.ac.uk/efo/EFO_0004611):1e-182|Cholesterol, total (http://www.ebi.ac.uk/efo/EFO_0004574):3e-139|Lipoprotein-associated phospholipase A2 activity and mass (http://www.ebi.ac.uk/efo/EFO_0004746):2e-07|LDL (oxidized) (http://www.ebi.ac.uk/efo/EFO_0004611):3e-47|Metabolic syndrome (…	KEGG:Fat digestion and absorption|KEGG:Vitamin digestion and absorption|KEGG:Cholesterol metabolism|PathC: pid:amb2 Integrin signaling|PathC: pid:FOXA1 transcription factor network|RxT:Binding and Uptake of Ligands by Scavenger Receptors|RxT:Cargo recognition for clathrin-mediated endocytosis|RxT:Cell surface interactions at the vascular wall|RxT:Chylomicron assembly|RxT:Chylomicron clearance|RxT…	Lipid metabolism disorder (ZScore: 7.593)|Atherosclerosis (ZScore: 7.315)|Coronary artery disease (ZScore: 7.239)|Diabetes mellitus (ZScore: 6.336)|Obesity (ZScore: 5.748)
Q49AH0	Cerebral dopamine neurotrophic factor	Prevalent T2D	CDNF	NotT2DNet	Tbio			Endoplasmic Reticulum		MIM Number: 611233			Parental extreme longevity (95 years and older) (http://www.ebi.ac.uk/efo/EFO_0007796):6e-06|Blood protein levels (http://www.ebi.ac.uk/efo/EFO_0007937):5e-29|Blood protein levels (http://www.ebi.ac.uk/efo/EFO_0007937):3e-20		Parkinson's disease (ZScore: 5.126)
P05155	Plasma protease C1 inhibitor	Prevalent T2D	SERPING1	T2DNet	Tbio	Serine protease inhibitor	PC00191:protease inhibitor|PC00095:enzyme modulator|PC00204:serine protease inhibitor	Plasma membrane	GO:0004867|F:serine-type endopeptidase inhibitor activity|IDA	MIM Number: 606860; Phenotype: Angioedema, hereditary, types I and II, 106100 (3); Complement component 4, partial deficiency of, 120790 (3)	MP:0005385:c-v sys_phen		General cognitive ability (http://www.ebi.ac.uk/efo/EFO_0004337):4e-06|Worry too long after an embarrassing experience (http://www.ebi.ac.uk/efo/EFO_0009589):1e-11|Neuroticism (http://www.ebi.ac.uk/efo/EFO_0007660):2e-09|Blood protein levels (http://www.ebi.ac.uk/efo/EFO_0007937):1e-119|Blood protein levels (http://www.ebi.ac.uk/efo/EFO_0008261):8e-14|Blood protein levels (http://www.ebi.ac.uk/ef…	KEGG:Complement and coagulation cascades|KEGG:Pertussis|RxT:Complement cascade|RxT:Formation of Fibrin Clot (Clotting Cascade)|RxT:Hemostasis|RxT:Immune System|RxT:Innate Immune System|RxT:Intrinsic Pathway of Fibrin Clot Formation|RxT:Platelet activation, signaling and aggregation|RxT:Platelet degranulation|RxT:Regulation of Complement cascade|RxT:Response to elevated platelet cytosolic Ca2+|W_P…	Angioedema (ZScore: 8.882)|C1 inhibitor deficiency (ZScore: 7.460)|Urticaria (ZScore: 5.396)|Lupus erythematosus (ZScore: 3.729)|Vascular disease (ZScore: 3.699)
P06681	Complement C2	Prevalent T2D	C2	T2DNet	Tbio			Vesicles		MIM Number: 613927; Phenotype: C2 deficiency, 217000 (3); {Macular degeneration, age-related, 14, reduced risk of}, 615489 (3)			General cognitive ability (http://www.ebi.ac.uk/efo/EFO_0004337):1e-06|General cognitive ability (http://www.ebi.ac.uk/efo/EFO_0004337):1e-06|Cognitive performance (MTAG) (http://www.ebi.ac.uk/efo/EFO_0008354):2e-09|Cognitive performance (MTAG) (http://www.ebi.ac.uk/efo/EFO_0008354):2e-09|Educational attainment (years of education) (http://www.ebi.ac.uk/efo/EFO_0004784):4e-14|Educational attainme…	KEGG:Complement and coagulation cascades|KEGG:Pertussis|KEGG:Staphylococcus aureus infection|KEGG:Systemic lupus erythematosus|RxT:Activation of C3 and C5|RxT:Complement cascade|RxT:Immune System|RxT:Initial triggering of complement|RxT:Innate Immune System|RxT:Regulation of Complement cascade|W_P:Oxidative Damage|W_P:Allograft Rejection|W_P:Complement Activation|W_P:Human Complement System|W_P:C…	Age related macular degeneration (ZScore: 5.126)|Membranoproliferative glomerulonephritis (ZScore: 3.562)|Basal laminar drusen (ZScore: 3.299)|Complement deficiency (ZScore: 3.187)
Q08380	Galectin-3-binding protein	Prevalent T2D	LGALS3BP	NotT2DNet	Tbio			Plasma membrane		MIM Number: 600626	MP:0005376:homeostasis/metabolism phenotype|MP:0005387:immune sys_phen			RxT:Hemostasis|RxT:Platelet activation, signaling and aggregation|RxT:Platelet degranulation|RxT:Response to elevated platelet cytosolic Ca2+	Liver disease (ZScore: 4.176)|Ostertagiasis (ZScore: 4.064)|Hepatitis C (ZScore: 4.036)|Cancer (ZScore: 3.888)|Hepatitis B (ZScore: 3.646)
P06396	Gelsolin	Prevalent T2D	GSN	T2DNet	Tbio	Non-motor actin binding protein	PC00041:actin family cytoskeletal protein|PC00085:cytoskeletal protein|PC00165:non-motor actin binding protein	Actin filaments	GO:1990000|P:amyloid fibril formation|IMP; GO:0097284|P:hepatocyte apoptotic process|IMP; GO:1902174|P:positive regulation of keratinocyte apoptotic process|IMP; GO:0031648|P:protein destabilization|IMP; GO:0042989|P:sequestering of actin monomers|IMP	MIM Number: 137350; Phenotype: Amyloidosis, Finnish type, 105120 (3)	MP:0010768:mortality/aging|MP:0005389:reproductive sys_phen|MP:0005385:c-v sys_phen|MP:0005397:hematopoietic sys_phen|MP:0005388:respiratory sys_phen|MP:0005387:immune sys_phen|MP:0005390:skeleton phenotype|MP:0003631:nervous sys_phen|MP:0010771:integument phenotype|MP:0005379:endocrine/exocrine gland phenotype|MP:0005384:cel_phen|MP:0005376:homeostasis/metabolism phenotype		Pulse pressure (http://www.ebi.ac.uk/efo/EFO_0005763):3e-06|Blood protein levels (http://www.ebi.ac.uk/efo/EFO_0007937):5e-09|Bipolar disorder and schizophrenia (http://www.ebi.ac.uk/efo/EFO_0000677):6e-06	KEGG:Fc gamma R-mediated phagocytosis|KEGG:Regulation of actin cytoskeleton|KEGG:Viral carcinogenesis|PathC: panther:FAS signaling pathway|PathC: pid:Coregulation of Androgen receptor activity|PathC: netpath:EGFR1|PathC: netpath:AndrogenReceptor|PathC: pid:N-cadherin signaling events|PathC: pid:Caspase Cascade in Apoptosis|PathC: pid:Osteopontin-mediated events|RxT:Amyloid fiber formation|RxT:Apo…	Amyloidosis (ZScore: 6.258)|Cutis laxa (ZScore: 5.011)|Lattice corneal dystrophy (ZScore: 4.674)|Cancer (ZScore: 4.035)|Neuropathy (ZScore: 3.644)
P08581	Hepatocyte growth factor receptor	Prevalent T2D	MET	T2DNet	Tclin	Kinase; MET family		Cytosol| Plasma membrane	GO:0001886|P:endothelial cell morphogenesis|IDA; GO:0061436|P:establishment of skin barrier|IMP; GO:0035024|P:negative regulation of Rho protein signal transduction|IDA; GO:0051497|P:negative regulation of stress fiber assembly|IDA; GO:0070495|P:negative regulation of thrombin-activated receptor signaling pathway|IDA	MIM Number: 164860; Phenotype: Renal cell carcinoma, papillary, 1, familial and somatic, 605074 (3); Hepatocellular carcinoma, childhood type, somatic, 114550 (3); ?Deafness, autosomal recessive 97, 616705 (3); {Osteofibrous dysplasia, susceptibility to}, 607278 (3)|MIM Number: 603514	MP:0005379:endocrine/exocrine gland phenotype|MP:0010771:integument phenotype|MP:0005378:growth/size/body region phenotype|MP:0005382:craniofacial phenotype|MP:0005369:muscle phenotype|MP:0005384:cel_phen|MP:0005387:immune sys_phen|MP:0005376:homeostasis/metabolism phenotype|MP:0005386:behavior/neurological phenotype|MP:0005370:liver/biliary sys_phen|MP:0005388:respiratory sys_phen|MP:0005380:emb…		Triglycerides (http://www.ebi.ac.uk/efo/EFO_0004530):2e-08|Resting heart rate (http://www.ebi.ac.uk/efo/EFO_0004351):7e-06|Gamma glutamyl transferase levels (http://www.ebi.ac.uk/efo/EFO_0004532):5e-09|Blood protein levels (http://www.ebi.ac.uk/efo/EFO_0007937):1e-06|Multiple sclerosis (severity) (http://www.ebi.ac.uk/efo/EFO_0003885):6e-06|Hematocrit (http://www.ebi.ac.uk/efo/EFO_0004348):2e-06|…	KEGG:PI3K-Akt signaling pathway|KEGG:Central carbon metabolism in cancer|KEGG:Axon guidance|KEGG:EGFR tyrosine kinase inhibitor resistance|KEGG:Gastric cancer|KEGG:Focal adhesion|KEGG:Adherens junction|KEGG:Melanoma|KEGG:Renal cell carcinoma|KEGG:Malaria|KEGG:Epithelial cell signaling in Helicobacter pylori infection|KEGG:Hepatocellular carcinoma|KEGG:Rap1 signaling pathway|KEGG:Ras signaling pat…	Cancer (ZScore: 6.368)|Lung disease (ZScore: 5.038)|Stomach disease (ZScore: 4.702)|Liver disease (ZScore: 4.638)|Breast disease (ZScore: 3.869)
P49862	Kallikrein-7	Prevalent T2D	KLK7	NotT2DNet	Tchem	Serine protease	PC00203:serine protease	Plasma membrane					Blood protein levels (http://www.ebi.ac.uk/efo/EFO_0007937):1e-45|Blood protein levels (http://www.ebi.ac.uk/efo/EFO_0007937):1e-66|Blood protein levels (http://www.ebi.ac.uk/efo/EFO_0008195):1e-15|Blood protein levels (http://www.ebi.ac.uk/efo/EFO_0007937):4e-24	RxT:Degradation of the extracellular matrix|RxT:Extracellular matrix organization|W_P:Hair Follicle Development: Cytodifferentiation (Part 3 of 3)|W_P:Hair Follicle Development: Cytodifferentiation (Part 3 of 3)|W_P:Hair Follicle Development: Cytodifferentiation (Part 3 of 3)|W_P:DNA Damage Response (only ATM dependent)|W_P:Extracellular vesicle-mediated signaling in recipient cells|W_P:Bone Morp…	Netherton syndrome (ZScore: 5.840)|Cancer (ZScore: 3.962)|Atopic dermatitis (ZScore: 3.621)|Rosacea (ZScore: 3.336)|Ichthyosis (ZScore: 3.045)
O00339	Matrilin-2	Prevalent T2D	MATN2	T2DNet	Tbio	Receptor	PC00197:receptor	Secreted		MIM Number: 602108			Adverse response to chemotherapy (neutropenia/leucopenia) (paclitaxel) (http://purl.obolibrary.org/obo/GO_1901555, http://purl.obolibrary.org/obo/GO_0097327):2e-06|Erectile dysfunction (http://www.ebi.ac.uk/efo/EFO_0004234):6e-07		Achondrogenesis (ZScore: 3.346)|Fraser syndrome (ZScore: 3.052)
Q99983	Osteomodulin	Prevalent T2D	OMD	T2DNet	Tbio			Golgi apparatus| Golgi lumen| Lysosome| Vesicles		0	MP:0005390:skeleton phenotype|MP:0005386:behavior/neurological phenotype		Lung function (FVC) (http://www.ebi.ac.uk/efo/EFO_0004312):3e-11|Systolic blood pressure (http://www.ebi.ac.uk/efo/EFO_0006335):8e-12|Pulse pressure (http://www.ebi.ac.uk/efo/EFO_0005763):2e-10	RxT:Defective B4GALT1 causes B4GALT1-CDG (CDG-2d)|RxT:Defective CHST6 causes MCDC1|RxT:Defective ST3GAL3 causes MCT12 and EIEE15|RxT:Disease|RxT:Diseases associated with glycosaminoglycan metabolism|RxT:Diseases of glycosylation|RxT:Glycosaminoglycan metabolism|RxT:Keratan sulfate biosynthesis|RxT:Keratan sulfate degradation|RxT:Keratan sulfate/keratin metabolism|RxT:Metabolism|RxT:Metabolism of …	Dystonia (ZScore: 5.607)|Aromatic L-amino acid decarboxylase deficiency (ZScore: 4.877)|Parkinson's disease (ZScore: 4.489)|Meckel's diverticulum (ZScore: 4.428)|Occult macular dystrophy (ZScore: 4.199)
Q15063	Periostin	Prevalent T2D	POSTN	T2DNet	Tbio	Signaling	PC00069:cell adhesion molecule|PC00207:signaling molecule	Golgi apparatus| Nucleoplasm	GO:0071307|P:cellular response to vitamin K|IDA	MIM Number: 608777	MP:0005387:immune sys_phen|MP:0005390:skeleton phenotype|MP:0005371:limbs/digits/tail phenotype|MP:0010768:mortality/aging|MP:0005389:reproductive sys_phen|MP:0005385:c-v sys_phen|MP:0005397:hematopoietic sys_phen|MP:0002006:neoplasm|MP:0005386:behavior/neurological phenotype|MP:0005384:cel_phen|MP:0005376:homeostasis/metabolism phenotype|MP:0005382:craniofacial phenotype|MP:0005378:growth/size/b…	MP:0000063:decr bone mineral density|MP:0001402:hypoact|MP:0001523:impaired righting resp|MP:0001258:decr body lgt|MP:0003961:decr lean body mass|MP:0003795:abnl bone struct|MP:0010124:decr bone mineral content|MP:0011275:abnl behavioral resp to light|MP:0011275:abnl behavioral resp to light|MP:0010052:incr grip strength|MP:0010025:decr total body fat amount|MP:0010025:decr total body fat amount|…	Blood protein levels (http://www.ebi.ac.uk/efo/EFO_0007937):7e-23|Blood protein levels (http://www.ebi.ac.uk/efo/EFO_0007937):2e-28|Cerebrospinal fluid biomarker levels (http://www.ebi.ac.uk/efo/EFO_0006794):3e-09|Life satisfaction (http://www.ebi.ac.uk/efo/EFO_0007869):2e-06|Smoking initiation (ever regular vs never regular) (MTAG) (http://www.ebi.ac.uk/efo/EFO_0006527):3e-11|Smoking initiation …	W_P:Amplification and Expansion of Oncogenic Pathways as Metastatic Traits|W_P:Amplification and Expansion of Oncogenic Pathways as Metastatic Traits|W_P:Amplification and Expansion of Oncogenic Pathways as Metastatic Traits|W_P:Exercise-induced Circadian Regulation|W_P:RAC1/PAK1/p38/MMP2 Pathway|W_P:Arrhythmogenic Right Ventricular Cardiomyopathy|W_P:Robo4 and VEGF Signaling Pathways Crosstalk|W…	Asthma (ZScore: 5.460)|Common cold (ZScore: 4.553)|Cancer (ZScore: 4.222)|Hypereosinophilic syndrome (ZScore: 4.151)|Atopic dermatitis (ZScore: 4.030)
P10082	Peptide YY	Prevalent T2D	PYY	T2DNet	Tbio	Neuropeptide	PC00162:neuropeptide|PC00207:signaling molecule|PC00179:peptide hormone	Secreted		MIM Number: 600781	MP:0005390:skeleton phenotype|MP:0005387:immune sys_phen|MP:0003631:nervous sys_phen|MP:0005371:limbs/digits/tail phenotype|MP:0005397:hematopoietic sys_phen|MP:0005386:behavior/neurological phenotype|MP:0005376:homeostasis/metabolism phenotype|MP:0005375:adipose tissue phenotype|MP:0005378:growth/size/body region phenotype		Diverticular disease (http://www.ebi.ac.uk/efo/EFO_1001460):5e-06|Response to taxane treatment (placlitaxel) (http://purl.obolibrary.org/obo/GO_1901555):9e-06|Total body bone mineral density (http://www.ebi.ac.uk/efo/EFO_0003923):2e-09|Pulse pressure (http://www.ebi.ac.uk/efo/EFO_0005763):4e-08|Blood protein levels (http://www.ebi.ac.uk/efo/EFO_0007937):1e-09|DNA methylation variation (age effect…	KEGG:Neuroactive ligand-receptor interaction|PathC: inoh:Heterotrimeric GPCR signaling pathway (through G alpha q, PLC beta and ERK cascade) ( GPCR signaling (G alpha q) )|PathC: inoh:Heterotrimeric GPCR signaling pathway (through G alpha s ACs Epac BRaf and ERKcascade) ( GPCR signaling (G alpha s, Epac and ERK) )|PathC: inoh:Heterotrimeric GTP-binding protein coupled receptor signaling pathway (…	Obesity (ZScore: 6.130)|Eating disorder (ZScore: 5.306)|Diabetes mellitus (ZScore: 4.955)|Constipation (ZScore: 4.419)|Diarrhea (ZScore: 3.903)
P00797	Renin	Prevalent T2D	REN	T2DNet	Tclin	Aspartic protease	PC00053:aspartic protease|PC00190:protease|PC00121:hydrolase	Plasma membrane	GO:0002003|P:angiotensin maturation|IDA	MIM Number: 179820; Phenotype: [Hyperproreninemia] (3); Renal tubular dysgenesis, 267430 (3); Hyperuricemic nephropathy, familial juvenile 2, 613092 (3)|MIM Number: 609848	MP:0010768:mortality/aging|MP:0005385:c-v sys_phen|MP:0005397:hematopoietic sys_phen|MP:0005386:behavior/neurological phenotype|MP:0005387:immune sys_phen|MP:0005367:renal/urinary sys_phen|MP:0003631:nervous sys_phen|MP:0005369:muscle phenotype|MP:0005378:growth/size/body region phenotype|MP:0005376:homeostasis/metabolism phenotype	MP:0001262:decr body w-t|MP:0010025:decr total body fat amount|MP:0002874:decr Hb content|MP:0003179:thrombocytopenia|MP:0005553:incr circl creatinine lvl|MP:0002074:abnl hair texture|MP:0001413:abnl resp to new environment|MP:0001262:decr body w-t|MP:0005316:abnl resp to tactile stimuli	Psychosis proneness (hypomanic personality scale) (http://www.ebi.ac.uk/efo/EFO_0008337):3e-07|Psychosis proneness (hypomanic personality scale and perceptual aberration scale) (http://www.ebi.ac.uk/efo/EFO_0008337):2e-06|Psychosis proneness (hypomanic personality scale and revised physical anhedonia scale) (http://www.ebi.ac.uk/efo/EFO_0008337):2e-06|Psychosis proneness (hypomanic personality sc…	KEGG:Renin-angiotensin system|KEGG:Renin secretion|RxT:Metabolism of Angiotensinogen to Angiotensins|RxT:Metabolism of proteins|RxT:Peptide hormone metabolism|W_P:ACE Inhibitor Pathway|W_P:ACE Inhibitor Pathway|W_P:Cardiac Progenitor Differentiation|W_P:Cardiac Hypertrophic Response|W_P:Canonical and Non-Canonical TGF-B signaling|W_P:Cytokines and Inflammatory Response|W_P:Interleukin-11 Signalin…	Hypertension (ZScore: 9.072)|Kidney disease (ZScore: 7.900)|Conn's syndrome (ZScore: 7.580)|Hypokalemia (ZScore: 6.964)|Primary hyperaldosteronism (ZScore: 6.744)
Q6NW40	RGM domain family member B	Prevalent T2D	RGMB	T2DNet	Tbio			Nucleoplasm		MIM Number: 612687	MP:0010768:mortality/aging		Sum eosinophil basophil counts (http://www.ebi.ac.uk/efo/EFO_0005090, http://www.ebi.ac.uk/efo/EFO_0004842):2e-09|Basophil percentage of granulocytes (http://www.ebi.ac.uk/efo/EFO_0007995):3e-10|Hair color (http://www.ebi.ac.uk/efo/EFO_0007822):3e-09	KEGG:TGF-beta signaling pathway|PathC: pid:BMP receptor signaling|RxT:Axon guidance|RxT:Developmental Biology|RxT:Netrin-1 signaling	Cerebrovascular disease (ZScore: 3.589)|Hemochromatosis (ZScore: 3.587)
P04278	Sex hormone-binding globulin	Prevalent T2D	SHBG	T2DNet	Tchem			Vesicles		MIM Number: 182205			Heel bone mineral density (http://www.ebi.ac.uk/efo/EFO_0009270):1e-16|Sex hormone-binding globulin levels (http://www.ebi.ac.uk/efo/EFO_0004696):2e-16|Sex hormone-binding globulin levels (http://www.ebi.ac.uk/efo/EFO_0004696):2e-106|Sex hormone-binding globulin levels (http://www.ebi.ac.uk/efo/EFO_0004696):4e-80|Sex hormone-binding globulin levels (http://www.ebi.ac.uk/efo/EFO_0004696):6e-30|Sex…	PathC: pid:Nongenotropic Androgen signaling	Polycystic ovary syndrome (ZScore: 7.551)|Hyperandrogenism (ZScore: 7.018)|Hypogonadism (ZScore: 6.297)|Obesity (ZScore: 5.726)|Anovulation (ZScore: 5.410)
O94991	SLIT and NTRK-like protein 5	Prevalent T2D	SLITRK5	NotT2DNet	Tbio			Nucleoplasm| Golgi apparatus		MIM Number: 609680	MP:0005385:c-v sys_phen|MP:0005386:behavior/neurological phenotype|MP:0003631:nervous sys_phen|MP:0010771:integument phenotype			RxT:Neuronal System|RxT:Protein-protein interactions at synapses|RxT:Receptor-type tyrosine-protein phosphatases	obsessive-compulsive disorder (ZScore: 4.954)|Supratentorial primitive neuroectodermal tumor (ZScore: 3.765)|Trichotillomania (ZScore: 3.341)
Q03167	Transforming growth factor beta receptor type 3	Prevalent T2D	TGFBR3	T2DNet	Tbio			Cytosol	GO:0050431|F:transforming growth factor beta binding|IDA; GO:0070123|F:transforming growth factor beta receptor activity, type III|IDA; GO:0005114|F:type II transforming growth factor beta receptor binding|IDA; GO:0060389|P:pathway-restricted SMAD protein phosphorylation|IMP	MIM Number: 600742	MP:0005384:cel_phen|MP:0005369:muscle phenotype|MP:0005370:liver/biliary sys_phen|MP:0005390:skeleton phenotype|MP:0005387:immune sys_phen|MP:0005371:limbs/digits/tail phenotype|MP:0005397:hematopoietic sys_phen|MP:0005385:c-v sys_phen|MP:0005389:reproductive sys_phen|MP:0010768:mortality/aging		Type 2 diabetes (http://www.ebi.ac.uk/efo/EFO_0001360):4e-06|HDL cholesterol change in response to fenofibrate in statin-treated type 2 diabetes (http://www.ebi.ac.uk/efo/EFO_0007805, http://purl.obolibrary.org/obo/GO_1903491, http://www.ebi.ac.uk/efo/EFO_0001360, http://purl.obolibrary.org/obo/GO_1901557):9e-07|Gestational age at birth (maternal effect) (http://www.ebi.ac.uk/efo/EFO_0005112, htt…	PathC: netpath:TGF_beta_Receptor|PathC: pid:TGF-beta receptor signaling|W_P:TGF-beta Receptor Signaling|W_P:TGF-beta Receptor Signaling|W_P:TGF-beta Receptor Signaling|W_P:Integrated Breast Cancer Pathway|W_P:Hematopoietic Stem Cell Differentiation|W_P:Sudden Infant Death Syndrome (SIDS) Susceptibility Pathways|W_P:Pathways in clear cell renal cell carcinoma|W_P:Signaling of Hepatocyte Growth Fac…	Cancer (ZScore: 3.266)
P07477	Trypsin-1	Prevalent T2D	PRSS1	T2DNet	Tclin	Serine protease	PC00203:serine protease|PC00190:protease|PC00121:hydrolase	Vesicles		MIM Number: 276000; Phenotype: Pancreatitis, hereditary, 167800 (3); Trypsinogen deficiency, 614044 (1)		MP:0000443:abnl snout morphol|MP:0001303:abnl lens morphol|MP:0003795:abnl bone struct|MP:0005385:c-v system phenotype|MP:0010392:prolonged QRS cplx duration|MP:0000452:abnl mouth morphol|MP:0004924:abnl behavior|MP:0002574:incr vertical act|MP:0005292:improved gluc tolerance|MP:0011471:decr urine creatinine lvl|MP:0011396:abnl sleep behavior|MP:0011396:abnl sleep behavior|MP:0000221:decr leukocy…	Pancreatitis (http://www.ebi.ac.uk/efo/EFO_0000278):2e-14|Cancer (http://www.ebi.ac.uk/efo/EFO_0000311):3e-07|Scarlet fever (http://www.ebi.ac.uk/efo/EFO_0008409):1e-07|Alcoholic chronic pancreatitis (http://www.ebi.ac.uk/efo/EFO_1002013):6e-22|Alcoholic chronic pancreatitis (http://www.ebi.ac.uk/efo/EFO_1002013):2e-22|Alcoholic chronic pancreatitis (http://www.ebi.ac.uk/efo/EFO_1002013):2e-22|Al…	KEGG:Protein digestion and absorption|KEGG:Pancreatic secretion|KEGG:Neuroactive ligand-receptor interaction|KEGG:Influenza A|RxT:Activation of Matrix Metalloproteinases|RxT:Cobalamin (Cbl, vitamin B12) transport and metabolism|RxT:Degradation of the extracellular matrix|RxT:Extracellular matrix organization|RxT:Metabolism|RxT:Metabolism of vitamins and cofactors|RxT:Metabolism of water-soluble v…	Pancreatitis (ZScore: 7.272)|Pancreatic cancer (ZScore: 4.939)|Cystic fibrosis (ZScore: 4.505)|Autoimmune pancreatitis (ZScore: 3.920)|Duodenal obstruction (ZScore: 3.638)
P98066	Tumor necrosis factor-inducible gene 6 protein	Prevalent T2D	TNFAIP6	T2DNet	Tbio			Secreted		MIM Number: 600410	MP:0005387:immune sys_phen|MP:0005389:reproductive sys_phen|MP:0005388:respiratory sys_phen|MP:0005379:endocrine/exocrine gland phenotype		Lung cancer (http://www.ebi.ac.uk/efo/EFO_0001071):5e-06|Blood protein levels (http://www.ebi.ac.uk/efo/EFO_0007937):2e-25|Blood protein levels (http://www.ebi.ac.uk/efo/EFO_0008311):2e-11|Blood protein levels (http://www.ebi.ac.uk/efo/EFO_0007937):8e-132	RxT:Immune System|RxT:Innate Immune System|RxT:Neutrophil degranulation	Arthritis (ZScore: 4.114)|Ulceroglandular tularemia (ZScore: 3.765)
Q9Y5W5	Wnt inhibitory factor 1	Prevalent T2D	WIF1	T2DNet	Tbio	Calcium-binding protein	PC00060:calcium-binding protein			MIM Number: 605186	MP:0010768:mortality/aging|MP:0002006:neoplasm|MP:0005390:skeleton phenotype		Post bronchodilator FEV1/FVC ratio (http://purl.obolibrary.org/obo/GO_0097366, http://www.ebi.ac.uk/efo/EFO_0004713):4e-06	KEGG:Wnt signaling pathway|PathC: inoh:Xenopus axis formation Wnt signaling pathway ( Xenopus axis formation Wnt signaling pathway Diagram )|PathC: inoh:Canonical Wnt signaling pathway ( Xenopus axis formation Wnt signaling pathway Diagram )|PathC: inoh:Canonical Wnt signaling pathway ( Canonical Wnt signaling pathway Diagram )|PathC: inoh:Canonical Wnt signaling pathway ( Drosophila Wingless/Wnt…	Cancer (ZScore: 4.280)|Gastrointestinal system disease (ZScore: 3.481)|Lung disease (ZScore: 3.010)
P10912	Growth hormone receptor	Incident T2D	GHR	T2DNet	Tclin	Cytokine	PC00090:defense/immunity protein|PC00083:cytokine|PC00207:signaling molecule	Cytosol| Cytoplasmic bodies| Plasma membrane	GO:0042803|F:protein homodimerization activity|IDA; GO:0048009|P:insulin-like growth factor receptor signaling pathway|IMP; GO:0040018|P:positive regulation of multicellular organism growth|IMP	MIM Number: 600946; Phenotype: Laron dwarfism, 262500 (3); {Hypercholesterolemia, familial, modifier of}, 143890 (3); Increased responsiveness to growth hormone, 604271 (3); Growth hormone insensitivity, partial, 604271 (3)	MP:0005380:embryo phenotype|MP:0005370:liver/biliary sys_phen|MP:0005386:behavior/neurological phenotype|MP:0005385:c-v sys_phen|MP:0005397:hematopoietic sys_phen|MP:0005389:reproductive sys_phen|MP:0010768:mortality/aging|MP:0003631:nervous sys_phen|MP:0005371:limbs/digits/tail phenotype|MP:0005376:homeostasis/metabolism phenotype|MP:0005387:immune sys_phen|MP:0005384:cel_phen|MP:0005390:skeleto…	MP:0005385:c-v system phenotype|MP:0011275:abnl behavioral resp to light|MP:0011275:abnl behavioral resp to light	Plasma renin activity levels (http://www.ebi.ac.uk/efo/EFO_0006828):6e-06|Response to taxane treatment (docetaxel) (http://purl.obolibrary.org/obo/GO_0097327):3e-06|Myringotomy (http://www.ebi.ac.uk/efo/EFO_0007904):8e-06|Familial squamous cell lung carcinoma (http://www.ebi.ac.uk/efo/EFO_0000708, http://www.ebi.ac.uk/efo/EFO_0006953):9e-06|Familial squamous cell lung carcinoma (http://www.ebi.ac…	KEGG:PI3K-Akt signaling pathway|KEGG:JAK-STAT signaling pathway|KEGG:Neuroactive ligand-receptor interaction|KEGG:Cytokine-cytokine receptor interaction|PathC: inoh:Growth hormone signaling pathway(JAK2 STAT5) ( Growth hormone signaling(JAK2 STAT5) )|PathC: inoh:Cytokine receptor degradation signaling ( JAK-STAT pathway and regulation pathway Diagram )|PathC: inoh:JAK-STAT pathway and regulation …	Laron syndrome (ZScore: 6.927)|Acromegaly (ZScore: 5.368)|Turner syndrome (ZScore: 4.397)|Hypopituitarism (ZScore: 3.931)|Obesity (ZScore: 3.579)
P18065	Insulin-like growth factor-binding protein 2	Incident T2D	IGFBP2	T2DNet	Tchem	Protease inhibitor	PC00191:protease inhibitor	Endoplasmic Reticulum	GO:0031994|F:insulin-like growth factor I binding|IDA; GO:0042104|P:positive regulation of activated T cell proliferation|IDA	MIM Number: 146731	MP:0005387:immune sys_phen|MP:0005367:renal/urinary sys_phen|MP:0005370:liver/biliary sys_phen|MP:0005397:hematopoietic sys_phen|MP:0005385:c-v sys_phen		Esophageal cancer (alcohol interaction) (http://www.ebi.ac.uk/efo/EFO_0002916):4e-11	PathC: inoh:IGF1 signaling pathway ( IGF1 signaling pathway )|RxT:Metabolism of proteins|RxT:Regulation of Insulin-like Growth Factor (IGF) transport and uptake by Insulin-like Growth Factor Binding Proteins (IGFBPs)|W_P:Myometrial Relaxation and Contraction Pathways|W_P:Myometrial Relaxation and Contraction Pathways|W_P:Myometrial Relaxation and Contraction Pathways|W_P:Myometrial Relaxation and…	Cancer (ZScore: 4.647)|Prostate disease (ZScore: 3.672)|Diabetes mellitus (ZScore: 3.589)|Angelman syndrome (ZScore: 3.313)|Breast disease (ZScore: 3.259)
P14672	Solute carrier family 2, facilitated glucose transporter member 4 (Glucose transporter type 4, insulin-responsive) (GLUT-4)	UniProtKB	SLC2A4	T2DNet	Tbio	Class I transporters		Plasma membrane	GO:0032869|P:cellular response to insulin stimulus|IDA	MIM Number: 138190	MP:0005384:cel_phen|MP:0005376:homeostasis/metabolism phenotype|MP:0005369:muscle phenotype|MP:0005378:growth/size/body region phenotype|MP:0005379:endocrine/exocrine gland phenotype|MP:0005375:adipose tissue phenotype|MP:0005370:liver/biliary sys_phen|MP:0005387:immune sys_phen|MP:0003631:nervous sys_phen|MP:0005381:digestive/alimentary phenotype|MP:0010768:mortality/aging|MP:0005385:c-v sys_phen		Birth weight (http://www.ebi.ac.uk/efo/EFO_0004344):5e-06|Birth weight (http://www.ebi.ac.uk/efo/EFO_0004344):1e-15|Diastolic blood pressure (http://www.ebi.ac.uk/efo/EFO_0006336):1e-13|Eosinophil counts (http://www.ebi.ac.uk/efo/EFO_0004842):1e-09|Systolic blood pressure (http://www.ebi.ac.uk/efo/EFO_0006335):7e-19|Systolic blood pressure (http://www.ebi.ac.uk/efo/EFO_0006335):7e-12	KEGG:Adipocytokine signaling pathway|KEGG:Type II diabetes mellitus|KEGG:Insulin resistance|KEGG:FoxO signaling pathway|KEGG:AMPK signaling pathway|KEGG:Insulin signaling pathway|PathC: netpath:Leptin|PathC: inoh:Insulin receptor signaling ( Insulin receptor signaling )|PathC: pid:Class I PI3K signaling events mediated by Akt|PathC: pid:Insulin-mediated glucose transport|PathC: pid:Arf6 trafficki…	Diabetes mellitus (ZScore: 6.672)|Hyperglycemia (ZScore: 6.027)|Obesity (ZScore: 6.010)|Hyperinsulinism (ZScore: 5.221)|Polycystic ovary syndrome (ZScore: 3.592)
Q9NQB0	Transcription factor 7-like 2 (HMG box transcription factor 4) (T-cell-specific transcription factor 4) (T-cell factor 4) (TCF-4) (hTCF-4)	UniProtKB	TCF7L2	T2DNet	Tbio			Nucleoplasm| Nuclear bodies	GO:0070016|F:armadillo repeat domain binding|IPI; GO:0008013|F:beta-catenin binding|IDA; GO:0045295|F:gamma-catenin binding|IPI; GO:0001103|F:RNA polymerase II repressing transcription factor binding|IPI; GO:0044334|P:canonical Wnt signaling pathway involved in positive regulation of epithelial to mesenchymal transition|IMP; GO:0051897|P:positive regulation of protein kinase B signaling|IMP	MIM Number: 602228; Phenotype: {Diabetes mellitus, type 2, susceptibility to}, 125853 (3)	MP:0005375:adipose tissue phenotype|MP:0005379:endocrine/exocrine gland phenotype|MP:0010771:integument phenotype|MP:0005378:growth/size/body region phenotype|MP:0005384:cel_phen|MP:0005376:homeostasis/metabolism phenotype|MP:0005382:craniofacial phenotype|MP:0005371:limbs/digits/tail phenotype|MP:0003631:nervous sys_phen|MP:0005381:digestive/alimentary phenotype|MP:0005369:muscle phenotype|MP:00…	MP:0011100:preweaning leth complete penetrance|MP:0003960:incr lean body mass|MP:0010123:incr bone mineral content|MP:0010025:decr total body fat amount|MP:0010025:decr total body fat amount|MP:0000208:decr hematocrit|MP:0002599:incr mean platelet vol|MP:0001413:abnl resp to new environment|MP:0000745:tremors|MP:0004599:abnl vertebral arch morphol|MP:0002874:decr Hb content|MP:0010067:incr red bl…	Body mass index (http://www.ebi.ac.uk/efo/EFO_0004340):3e-10|Body mass index (http://www.ebi.ac.uk/efo/EFO_0004340):3e-13|Colorectal cancer (http://www.ebi.ac.uk/efo/EFO_0005842):4e-10|Colorectal cancer (http://www.ebi.ac.uk/efo/EFO_0005842):1e-09|General cognitive ability (http://www.ebi.ac.uk/efo/EFO_0004337):5e-06|Type 2 diabetes (http://www.ebi.ac.uk/efo/EFO_0001360):0.0|Type 2 diabetes (http…	KEGG:Gastric cancer|KEGG:Adherens junction|KEGG:Cushing syndrome|KEGG:Arrhythmogenic right ventricular cardiomyopathy (ARVC)|KEGG:Acute myeloid leukemia|KEGG:Breast cancer|KEGG:Basal cell carcinoma|KEGG:Hepatocellular carcinoma|KEGG:Prostate cancer|KEGG:Hippo signaling pathway|KEGG:Endometrial cancer|KEGG:Wnt signaling pathway|KEGG:Pathways in cancer|KEGG:Human papillomavirus infection|KEGG:Thyro…	Diabetes mellitus (ZScore: 6.045)|Obesity (ZScore: 3.884)|Hyperglycemia (ZScore: 3.177)|Cancer (ZScore: 3.055)
Q16821	Protein phosphatase 1 regulatory subunit 3A (Protein phosphatase 1 glycogen-associated regulatory subunit) (Protein phosphatase type-1 glycogen targeting subunit) (RG1)	UniProtKB	PPP1R3A	T2DNet	Tbio	Phosphatase modulator	PC00184:phosphatase modulator|PC00095:enzyme modulator	Membrane protein		MIM Number: 600917; Phenotype: Insulin resistance, severe, digenic, 125853 (3)	MP:0005369:muscle phenotype|MP:0005376:homeostasis/metabolism phenotype|MP:0005384:cel_phen|MP:0005378:growth/size/body region phenotype|MP:0005375:adipose tissue phenotype		Hand grip strength (http://www.ebi.ac.uk/efo/EFO_0006941):3e-08|Schizophrenia (http://www.ebi.ac.uk/efo/EFO_0000692):2e-08|Height (http://www.ebi.ac.uk/efo/EFO_0004339):2e-08|Body mass index (http://www.ebi.ac.uk/efo/EFO_0004340):2e-18|Schizophrenia (http://www.ebi.ac.uk/efo/EFO_0000692):5e-07	KEGG:Insulin resistance|KEGG:Insulin signaling pathway|PathC: pid:Insulin-mediated glucose transport|W_P:Insulin Signaling|W_P:Insulin Signaling|W_P:Insulin Signaling|W_P:Insulin Signaling|W_P:Insulin Signaling|W_P:Insulin Signaling|W_P:Insulin Signaling|W_P:Insulin Signaling|W_P:Insulin Signaling|W_P:Insulin Signaling|W_P:Insulin Signaling|W_P:Insulin Signaling|W_P:Insulin Signaling|W_P:Insulin …	Type 2 diabetes mellitus (ZScore: 3.604)
P52945	Pancreas/duodenum homeobox protein 1 (PDX-1) (Glucose-sensitive factor) (GSF) (Insulin promoter factor 1) (IPF-1) (Insulin upstream factor 1) (IUF-1) (Islet/duodenum homeobox-1) (IDX-1) (Somatostatin-transactivating factor 1) (STF-1)	UniProtKB	PDX1	T2DNet	Tbio			Nucleoplasm	GO:0003309|P:type B pancreatic cell differentiation|IDA	MIM Number: 608769; Phenotype: Lacticacidemia due to PDX1 deficiency, 245349 (3)|MIM Number: 600733; Phenotype: Pancreatic agenesis 1, 260370 (3); MODY, type IV, 606392 (3); {Diabetes mellitus, type II, susceptibility to}, 125853 (3)	MP:0005369:muscle phenotype|MP:0005384:cel_phen|MP:0005376:homeostasis/metabolism phenotype|MP:0005379:endocrine/exocrine gland phenotype|MP:0010768:mortality/aging|MP:0010771:integument phenotype|MP:0005378:growth/size/body region phenotype|MP:0005381:digestive/alimentary phenotype|MP:0005367:renal/urinary sys_phen|MP:0005387:immune sys_phen|MP:0005370:liver/biliary sys_phen	MP:0011100:preweaning leth complete penetrance	Pancreatic cancer (http://www.ebi.ac.uk/efo/EFO_0002618):5e-14|Pancreatic cancer (http://www.ebi.ac.uk/efo/EFO_0002618):2e-07|Blood sugar levels (http://www.ebi.ac.uk/efo/EFO_0004468):9e-10|Pancreatic cancer (http://www.ebi.ac.uk/efo/EFO_0002618):2e-09|Fasting plasma glucose (http://www.ebi.ac.uk/efo/EFO_0004465):1e-08|Fasting plasma glucose (http://www.ebi.ac.uk/efo/EFO_0004465):5e-10	KEGG:Type II diabetes mellitus|KEGG:Maturity onset diabetes of the young|KEGG:Insulin secretion|PathC: pid:FOXA2 and FOXA3 transcription factor networks|RxT:Developmental Biology|RxT:Regulation of beta-cell development|RxT:Regulation of gene expression in beta cells|RxT:Regulation of gene expression in early pancreatic precursor cells|W_P:PTF1A related regulatory pathway|W_P:PTF1A related regulat…	Pancreatic agenesis (ZScore: 5.395)|Diabetes mellitus (ZScore: 5.300)|Hyperglycemia (ZScore: 4.049)|Insulinoma (ZScore: 3.697)|Fibrosarcoma (ZScore: 3.422)
Q7RTY0	Monocarboxylate transporter 13 (MCT 13) (Solute carrier family 16 member 13)	UniProtKB	SLC16A13	NotT2DNet	Tdark	SLC16 family of monocarboxylate transporters	PC00227:transporter	Golgi apparatus					Type 2 diabetes (http://www.ebi.ac.uk/efo/EFO_0001360):8e-13
Q8NCK7	Monocarboxylate transporter 11 (MCT 11) (Solute carrier family 16 member 11)	UniProtKB	SLC16A11	T2DNet	Tbio	SLC16 family of monocarboxylate transporters	PC00227:transporter	ER membrane| Nuclear membrane| Plasma membrane		MIM Number: 615765			Type 2 diabetes (http://www.ebi.ac.uk/efo/EFO_0001360):5e-15|Number of common colds (http://www.ebi.ac.uk/efo/EFO_0008417):4e-06|Type 2 diabetes (http://www.ebi.ac.uk/efo/EFO_0001360):8e-11		Type 2 diabetes mellitus (ZScore: 3.161)
O15357	Phosphatidylinositol 3,4,5-trisphosphate 5-phosphatase 2 (EC 3.1.3.86) (Inositol polyphosphate phosphatase-like protein 1) (INPPL-1) (Protein 51C) (SH2 domain-containing inositol 5'-phosphatase 2) (SH2 domain-containing inositol phosphatase 2) (SHIP-2)	UniProtKB	INPPL1	T2DNet	Tchem			Golgi apparatus| Cytosol	GO:0042169|F:SH2 domain binding|IPI; GO:0001958|P:endochondral ossification|IMP	MIM Number: 600829; Phenotype: Opsismodysplasia, 258480 (3)	MP:0005378:growth/size/body region phenotype|MP:0005382:craniofacial phenotype|MP:0005376:homeostasis/metabolism phenotype|MP:0005386:behavior/neurological phenotype|MP:0005388:respiratory sys_phen|MP:0010768:mortality/aging			KEGG:B cell receptor signaling pathway|KEGG:Fc gamma R-mediated phagocytosis|KEGG:Inositol phosphate metabolism|KEGG:Metabolic pathways|KEGG:Phosphatidylinositol signaling system|KEGG:Insulin signaling pathway|PathC: panther:Inflammation mediated by chemokine and cytokine signaling pathway|PathC: panther:Insulin/IGF pathway-protein kinase B signaling cascade|PathC: panther:PI3 kinase pathway|Path…	Schneckenbecken dysplasia (ZScore: 4.255)|Oculocerebrorenal syndrome (ZScore: 3.627)|Diabetes mellitus (ZScore: 3.461)
Q13562	Neurogenic differentiation factor 1 (NeuroD) (NeuroD1) (Class A basic helix-loop-helix protein 3) (bHLHa3)	UniProtKB	NEUROD1	T2DNet	Tbio	Nuclease	PC00218:transcription factor|PC00170:nuclease|PC00171:nucleic acid binding|PC00055:basic helix-loop-helix transcription factor	Nucleoplasm| Nucleus	GO:0070888|F:E-box binding|IDA; GO:0046982|F:protein heterodimerization activity|IDA; GO:0001102|F:RNA polymerase II activating transcription factor binding|IPI	MIM Number: 601724; Phenotype: {Diabetes mellitus, noninsulin-dependent}, 125853 (3); Maturity-onset diabetes of the young 6, 606394 (3)	MP:0005391:vision/eye phenotype|MP:0005381:digestive/alimentary phenotype|MP:0005377:hearing/vestibular/ear phenotype|MP:0003631:nervous sys_phen|MP:0005367:renal/urinary sys_phen|MP:0005388:respiratory sys_phen|MP:0005386:behavior/neurological phenotype|MP:0005379:endocrine/exocrine gland phenotype|MP:0005378:growth/size/body region phenotype|MP:0010768:mortality/aging|MP:0005376:homeostasis/met…			KEGG:Maturity onset diabetes of the young|RxT:Developmental Biology|RxT:Regulation of beta-cell development|RxT:Regulation of gene expression in beta cells|RxT:Regulation of gene expression in endocrine-committed (NEUROG3+) progenitor cells|W_P:Sudden Infant Death Syndrome (SIDS) Susceptibility Pathways|W_P:Dopaminergic Neurogenesis	Diabetes mellitus (ZScore: 4.874)|Hyperglycemia (ZScore: 3.609)
O43316	Paired box protein Pax-4	UniProtKB	PAX4	T2DNet	Tbio			Nucleoplasm| Nucleus		MIM Number: 167413; Phenotype: Maturity-onset diabetes of the young, type IX, 612225 (3); Diabetes mellitus, type 2, 125853 (3); {Diabetes mellitus, ketosis-prone, susceptibility to}, 612227 (3)	MP:0005376:homeostasis/metabolism phenotype|MP:0005379:endocrine/exocrine gland phenotype|MP:0010768:mortality/aging|MP:0005378:growth/size/body region phenotype	MP:0002965:incr circl serum albumin lvl|MP:0002968:incr circl ALP lvl|MP:0011100:preweaning leth complete penetrance|MP:0010378:incr respiratory quotient|MP:0005568:incr circl total protein lvl|MP:0012361:decr large unstained cell nr|MP:0012361:decr large unstained cell nr|MP:0000745:tremors|MP:0001512:trunk curl|MP:0001523:impaired righting resp|MP:0001258:decr body lgt|MP:0005333:decr heart rat…	Reaction time (http://www.ebi.ac.uk/efo/EFO_0008393):6e-06|Type 2 diabetes (http://www.ebi.ac.uk/efo/EFO_0001360):2e-10|Type 2 diabetes (http://www.ebi.ac.uk/efo/EFO_0001360):2e-12|Type 2 diabetes (adjusted for BMI) (http://www.ebi.ac.uk/efo/EFO_0001360):4e-13	KEGG:Maturity onset diabetes of the young|RxT:Developmental Biology|RxT:Regulation of beta-cell development|RxT:Regulation of gene expression in endocrine-committed (NEUROG3+) progenitor cells|W_P:Circadian rhythm related genes|W_P:Circadian rhythm related genes|W_P:Circadian rhythm related genes|W_P:Circadian rhythm related genes|W_P:Circadian rhythm related genes|W_P:Circadian rhythm related ge…	Diabetes mellitus (ZScore: 4.927)|Hyperglycemia (ZScore: 3.106)
P35568	Insulin receptor substrate 1 (IRS-1)	UniProtKB	IRS1	T2DNet	Tbio			Cytosol| Nucleoplasm	GO:0005158|F:insulin receptor binding|IPI; GO:0005159|F:insulin-like growth factor receptor binding|IPI; GO:0001784|F:phosphotyrosine residue binding|IPI; GO:0005070|F:SH3/SH2 adaptor activity|IDA; GO:0032869|P:cellular response to insulin stimulus|IMP; GO:0048009|P:insulin-like growth factor receptor signaling pathway|IPI; GO:0014065|P:phosphatidylinositol 3-kinase signaling|IDA; GO:0046326|P:po…	MIM Number: 147545; Phenotype: {Diabetes mellitus, noninsulin-dependent}, 125853 (3); {Coronary artery disease, susceptibility to} (3)	MP:0005390:skeleton phenotype|MP:0005387:immune sys_phen|MP:0005377:hearing/vestibular/ear phenotype|MP:0005371:limbs/digits/tail phenotype|MP:0010768:mortality/aging|MP:0005385:c-v sys_phen|MP:0005397:hematopoietic sys_phen|MP:0005384:cel_phen|MP:0005376:homeostasis/metabolism phenotype|MP:0005369:muscle phenotype|MP:0005375:adipose tissue phenotype|MP:0005379:endocrine/exocrine gland phenotype|…		Adolescent idiopathic scoliosis (http://www.ebi.ac.uk/efo/EFO_0005423):1e-09|Glucose homeostasis traits (http://www.ebi.ac.uk/efo/EFO_0004471, http://www.ebi.ac.uk/efo/EFO_0006896):7e-07|Heel bone mineral density (http://www.ebi.ac.uk/efo/EFO_0009270):1e-09|Cerebrospinal P-tau181p levels (http://www.ebi.ac.uk/efo/EFO_0004763):1e-07|Body fat percentage (http://www.ebi.ac.uk/efo/EFO_0007800):3e-08|…	KEGG:PI3K-Akt signaling pathway|KEGG:mTOR signaling pathway|KEGG:Regulation of lipolysis in adipocytes|KEGG:Adipocytokine signaling pathway|KEGG:Neurotrophin signaling pathway|KEGG:Longevity regulating pathway|KEGG:Type II diabetes mellitus|KEGG:Insulin resistance|KEGG:Non-alcoholic fatty liver disease (NAFLD)|KEGG:Longevity regulating pathway - multiple species|KEGG:Autophagy - animal|KEGG:FoxO …	Diabetes mellitus (ZScore: 6.378)|Obesity (ZScore: 5.910)|Hyperglycemia (ZScore: 5.456)|Hyperinsulinism (ZScore: 5.246)|Polycystic ovary syndrome (ZScore: 4.386)
P35680	Hepatocyte nuclear factor 1-beta (HNF-1-beta) (HNF-1B) (Homeoprotein LFB3) (Transcription factor 2) (TCF-2) (Variant hepatic nuclear factor 1) (vHNF1)	UniProtKB	HNF1B	T2DNet	Tbio	Nucleic acid binding	PC00218:transcription factor|PC00171:nucleic acid binding	Nucleoplasm	GO:0042803|F:protein homodimerization activity|IPI; GO:0031018|P:endocrine pancreas development|IMP; GO:0035565|P:regulation of pronephros size|IMP	MIM Number: 189907; Phenotype: Renal cysts and diabetes syndrome, 137920 (3); Diabetes mellitus, noninsulin-dependent, 125853 (3); {Renal cell carcinoma}, 144700 (3)	MP:0005367:renal/urinary sys_phen|MP:0005387:immune sys_phen|MP:0005370:liver/biliary sys_phen|MP:0005380:embryo phenotype|MP:0005379:endocrine/exocrine gland phenotype|MP:0005378:growth/size/body region phenotype|MP:0010768:mortality/aging|MP:0005369:muscle phenotype|MP:0005376:homeostasis/metabolism phenotype|MP:0005384:cel_phen		Type 2 diabetes (http://www.ebi.ac.uk/efo/EFO_0001360):9e-22|Type 2 diabetes (http://www.ebi.ac.uk/efo/EFO_0001360):9e-22|Endometrial cancer (http://www.ebi.ac.uk/efo/EFO_1001512):3e-20|Endometrial cancer (http://www.ebi.ac.uk/efo/EFO_1001512):3e-20|Endometrial cancer (endometrioid histology) (http://www.ebi.ac.uk/efo/EFO_1001512):3e-14|Endometrial cancer (endometrioid histology) (http://www.ebi.…	KEGG:Maturity onset diabetes of the young|RxT:Developmental Biology|RxT:Regulation of beta-cell development|RxT:Regulation of gene expression in early pancreatic precursor cells|RxT:Regulation of gene expression in late stage (branching morphogenesis) pancreatic bud precursor cells|W_P:Endoderm Differentiation|W_P:Endoderm Differentiation|W_P:Endoderm Differentiation|W_P:Endoderm Differentiation|…	Diabetes mellitus (ZScore: 4.797)|Kidney disease (ZScore: 4.043)|Ovarian disease (ZScore: 4.023)|CAKUT (ZScore: 4.012)|Prune belly syndrome (ZScore: 3.782)
P03886	NADH-ubiquinone oxidoreductase chain 1 (EC 7.1.1.2) (NADH dehydrogenase subunit 1)	UniProtKB	MT-ND1	T2DNet	Tclin	Dehydrogenase	PC00092:dehydrogenase|PC00198:reductase|PC00176:oxidoreductase	Mitochondria| Mitochondrial membrane						KEGG:Retrograde endocannabinoid signaling|KEGG:Thermogenesis|KEGG:Metabolic pathways|KEGG:Oxidative phosphorylation|KEGG:Parkinson disease|RxT:Complex I biogenesis|RxT:Metabolism|RxT:Metabolism of RNA|RxT:Respiratory electron transport|RxT:Respiratory electron transport, ATP synthesis by chemiosmotic coupling, and heat production by uncoupling proteins.|RxT:The citric acid (TCA) cycle and respira…	Echinococcosis (ZScore: 6.391)|Leber hereditary optic neuropathy (ZScore: 6.133)|Fascioliasis (ZScore: 4.365)|Coenurosis (ZScore: 4.200)|Leigh disease (ZScore: 4.145)
P41235	Hepatocyte nuclear factor 4-alpha (HNF-4-alpha) (Nuclear receptor subfamily 2 group A member 1) (Transcription factor 14) (TCF-14) (Transcription factor HNF-4)	UniProtKB	HNF4A	T2DNet	Tchem	2A. Hepatocyte nuclear factor-4 receptors	PC00218:transcription factor|PC00197:receptor|PC00171:nucleic acid binding|PC00169:C4 zinc finger nuclear receptor	Nucleoplasm	GO:0042803|F:protein homodimerization activity|IDA; GO:0007596|P:blood coagulation|IDA	MIM Number: 600281; Phenotype: MODY, type I, 125850 (3); {Diabetes mellitus, noninsulin-dependent}, 125853 (3); Fanconi renotubular syndrome 4, with maturity-onset diabetes of the young, 616026 (3)	MP:0003631:nervous sys_phen|MP:0005391:vision/eye phenotype|MP:0005390:skeleton phenotype|MP:0005380:embryo phenotype|MP:0005370:liver/biliary sys_phen|MP:0005385:c-v sys_phen|MP:0010768:mortality/aging|MP:0005376:homeostasis/metabolism phenotype|MP:0005384:cel_phen|MP:0005378:growth/size/body region phenotype	MP:0002792:abnl retinal vasculature morphol|MP:0002792:abnl retinal vasculature morphol|MP:0003960:incr lean body mass|MP:0003795:abnl bone struct|MP:0011964:incr total retina thickness|MP:0010123:incr bone mineral content|MP:0009142:decr prepulse inhib|MP:0010097:abnl retinal blood vessel morphol|MP:0010097:abnl retinal blood vessel morphol|MP:0004924:abnl behavior|MP:0010053:decr grip strength|…	Type 2 diabetes (http://www.ebi.ac.uk/efo/EFO_0001360):2e-08|Type 2 diabetes (http://www.ebi.ac.uk/efo/EFO_0001360):2e-08|HDL cholesterol (http://www.ebi.ac.uk/efo/EFO_0004612):2e-34|Cholesterol, total (http://www.ebi.ac.uk/efo/EFO_0004574):1e-24|Type 2 diabetes (http://www.ebi.ac.uk/efo/EFO_0001360):4e-10|Type 2 diabetes (http://www.ebi.ac.uk/efo/EFO_0001360):5e-08|HDL cholesterol (http://www.eb…	KEGG:Maturity onset diabetes of the young|KEGG:AMPK signaling pathway|PathC: pid:Regulation of nuclear SMAD2/3 signaling|PathC: netpath:TGF_beta_Receptor|PathC: pid:HIF-1-alpha transcription factor network|PathC: pid:FOXA2 and FOXA3 transcription factor networks|RxT:Developmental Biology|RxT:Gene expression (Transcription)|RxT:Generic Transcription Pathway|RxT:Nuclear Receptor transcription pathw…	Cancer (ZScore: 5.304)|Diabetes mellitus (ZScore: 5.096)|Intestinal disease (ZScore: 4.489)|Liver disease (ZScore: 4.349)|Stomach disease (ZScore: 3.600)
P51787	Potassium voltage-gated channel subfamily KQT member 1 (IKs producing slow voltage-gated potassium channel subunit alpha KvLQT1) (KQT-like 1) (Voltage-gated potassium channel subunit Kv7.1)	UniProtKB	KCNQ1	T2DNet	Tclin	Kv7.1/KCNQ1 sub-subfamily		Plasma membrane	GO:0005516|F:calmodulin binding|IDA; GO:0005251|F:delayed rectifier potassium channel activity|IDA; GO:0044325|F:ion channel binding|IPI; GO:0005546|F:phosphatidylinositol-4,5-bisphosphate binding|IDA; GO:0034236|F:protein kinase A catalytic subunit binding|IDA; GO:0034237|F:protein kinase A regulatory subunit binding|IDA; GO:0008157|F:protein phosphatase 1 binding|IDA; GO:0097110|F:scaffold prot…	MIM Number: 607542; Phenotype: Long QT syndrome 1, 192500 (3); Jervell and Lange-Nielsen syndrome, 220400 (3); Atrial fibrillation, familial, 3, 607554 (3); Short QT syndrome 2, 609621 (3); {Long QT syndrome 1, acquired, susceptibility to}, 192500 (3)	MP:0005378:growth/size/body region phenotype|MP:0005379:endocrine/exocrine gland phenotype|MP:0005376:homeostasis/metabolism phenotype|MP:0005369:muscle phenotype|MP:0003631:nervous sys_phen|MP:0005377:hearing/vestibular/ear phenotype|MP:0005385:c-v sys_phen|MP:0005386:behavior/neurological phenotype|MP:0005381:digestive/alimentary phenotype		Type 2 diabetes (http://www.ebi.ac.uk/efo/EFO_0001360):9e-10|Type 2 diabetes (http://www.ebi.ac.uk/efo/EFO_0001360):4e-29|Blood pressure measurement (high sodium intervention) (http://www.ebi.ac.uk/efo/EFO_0006340, http://www.ebi.ac.uk/efo/EFO_0005401):4e-07|Blood pressure measurement (high sodium intervention) (http://www.ebi.ac.uk/efo/EFO_0006335, http://www.ebi.ac.uk/efo/EFO_0005401):1e-06|QT …	KEGG:Gastric acid secretion|KEGG:Vibrio cholerae infection|KEGG:Protein digestion and absorption|KEGG:Adrenergic signaling in cardiomyocytes|KEGG:Pancreatic secretion|KEGG:Cholinergic synapse|PathC: netpath:TNFalpha|RxT:Cardiac conduction|RxT:Muscle contraction|RxT:Neuronal System|RxT:Phase 2 - plateau phase|RxT:Phase 3 - rapid repolarisation|RxT:Potassium Channels|RxT:Voltage gated Potassium cha…	Cardiomyopathy (ZScore: 7.069)|Short QT syndrome (ZScore: 6.087)|Beckwith-Wiedemann syndrome (ZScore: 5.205)|Atrial fibrillation (ZScore: 5.081)|Cardiac arrest (ZScore: 4.536)
P06213	Insulin receptor (IR) (EC 2.7.10.1) (CD antigen CD220) [Cleaved into: Insulin receptor subunit alpha; Insulin receptor subunit beta]	UniProtKB	INSR	T2DNet	Tclin	INSR family		Vesicles| Plasma membrane	GO:0001540|F:amyloid-beta binding|IPI; GO:0005524|F:ATP binding|IDA; GO:0005525|F:GTP binding|IDA; GO:0043559|F:insulin binding|IDA; GO:0043560|F:insulin receptor substrate binding|IPI; GO:0005009|F:insulin-activated receptor activity|IDA; GO:0031994|F:insulin-like growth factor I binding|IPI; GO:0031995|F:insulin-like growth factor II binding|IPI; GO:0005159|F:insulin-like growth factor receptor…	MIM Number: 147670; Phenotype: Leprechaunism, 246200 (3); Rabson-Mendenhall syndrome, 262190 (3); Diabetes mellitus, insulin-resistant, with acanthosis nigricans, 610549 (3); Hyperinsulinemic hypoglycemia, familial, 5, 609968 (3)	MP:0005379:endocrine/exocrine gland phenotype|MP:0005375:adipose tissue phenotype|MP:0005378:growth/size/body region phenotype|MP:0005384:cel_phen|MP:0005376:homeostasis/metabolism phenotype|MP:0005381:digestive/alimentary phenotype|MP:0005369:muscle phenotype|MP:0005389:reproductive sys_phen|MP:0010768:mortality/aging|MP:0005397:hematopoietic sys_phen|MP:0005370:liver/biliary sys_phen|MP:0005386…		Systolic blood pressure x alcohol consumption interaction (2df test) (http://www.ebi.ac.uk/efo/EFO_0006335, http://www.ebi.ac.uk/efo/EFO_0004329):2e-34|Diastolic blood pressure x alcohol consumption interaction (2df test) (http://www.ebi.ac.uk/efo/EFO_0006336, http://www.ebi.ac.uk/efo/EFO_0004329):4e-29|Mean arterial pressure x alcohol consumption interaction (2df test) (http://www.ebi.ac.uk/efo/…	KEGG:PI3K-Akt signaling pathway|KEGG:Adherens junction|KEGG:mTOR signaling pathway|KEGG:Regulation of lipolysis in adipocytes|KEGG:Longevity regulating pathway|KEGG:Type II diabetes mellitus|KEGG:Insulin resistance|KEGG:Non-alcoholic fatty liver disease (NAFLD)|KEGG:HIF-1 signaling pathway|KEGG:Longevity regulating pathway - multiple species|KEGG:FoxO signaling pathway|KEGG:AMPK signaling pathway…	Donohue syndrome (ZScore: 5.730)|Diabetes mellitus (ZScore: 4.487)|Polycystic ovary syndrome (ZScore: 4.444)|Acanthosis nigricans (ZScore: 4.389)|Hyperinsulinism (ZScore: 4.239)
P35557	Hexokinase-4 (HK4) (EC 2.7.1.1) (Glucokinase) (Hexokinase type IV) (HK IV) (Hexokinase-D)	UniProtKB	GCK	T2DNet	Tchem	Hexokinase family		Golgi apparatus| Cytosol	GO:0005524|F:ATP binding|IDA; GO:0004340|F:glucokinase activity|IDA; GO:0005536|F:glucose binding|IDA; GO:0051594|P:detection of glucose|IMP; GO:0045721|P:negative regulation of gluconeogenesis|IMP; GO:0045725|P:positive regulation of glycogen biosynthetic process|IMP	MIM Number: 138079; Phenotype: MODY, type II, 125851 (3); Diabetes mellitus, noninsulin-dependent, late onset, 125853 (3); Hyperinsulinemic hypoglycemia, familial, 3, 602485 (3); Diabetes mellitus, permanent neonatal, 606176 (3)|MIM Number: 603166	MP:0005370:liver/biliary sys_phen|MP:0010768:mortality/aging|MP:0005397:hematopoietic sys_phen|MP:0005376:homeostasis/metabolism phenotype|MP:0005367:renal/urinary sys_phen|MP:0005378:growth/size/body region phenotype|MP:0005379:endocrine/exocrine gland phenotype	MP:0002968:incr circl ALP lvl|MP:0011110:preweaning leth incomplete penetrance|MP:0013279:incr fasted circl gluc lvl|MP:0010087:incr circl fructosamine lvl|MP:0005293:impaired gluc tolerance|MP:0005559:incr circl gluc lvl|MP:0005293:impaired gluc tolerance|MP:0010053:decr grip strength|MP:0005505:thrombocytosis|MP:0001488:incr startle reflex|MP:0009142:decr prepulse inhib|MP:0002764:short tibia|M…	Glycated hemoglobin levels (http://www.ebi.ac.uk/efo/EFO_0004541):6e-08|Metabolic syndrome (http://www.ebi.ac.uk/efo/EFO_0000195):4e-13|Fasting plasma glucose (http://www.ebi.ac.uk/efo/EFO_0004465):1e-07|Body mass index (http://www.ebi.ac.uk/efo/EFO_0004340):3e-07|Homeostasis model assessment of beta-cell function (http://www.ebi.ac.uk/efo/EFO_0004469):2e-16|Fasting blood glucose (http://www.ebi.…	KEGG:Central carbon metabolism in cancer|KEGG:Glycolysis / Gluconeogenesis|KEGG:Type II diabetes mellitus|KEGG:Starch and sucrose metabolism|KEGG:Maturity onset diabetes of the young|KEGG:Carbon metabolism|KEGG:Glucagon signaling pathway|KEGG:Metabolic pathways|KEGG:Prolactin signaling pathway|KEGG:Galactose metabolism|KEGG:Neomycin, kanamycin and gentamicin biosynthesis|KEGG:Amino sugar and nucl…	Diabetes mellitus (ZScore: 6.204)|Hyperglycemia (ZScore: 5.623)|Hyperinsulinism (ZScore: 4.669)|Hypoglycemia (ZScore: 4.598)|Hyperinsulinemic hypoglycemia (ZScore: 4.292)
Q15848	Adiponectin (30 kDa adipocyte complement-related protein) (Adipocyte complement-related 30 kDa protein) (ACRP30) (Adipocyte, C1q and collagen domain-containing protein) (Adipose most abundant gene transcript 1 protein) (apM-1) (Gelatin-binding protein)	UniProtKB	ADIPOQ	T2DNet	Tbio			Endoplasmic Reticulum| Vesicles	GO:0042803|F:protein homodimerization activity|IPI; GO:0033691|F:sialic acid binding|IDA; GO:0034383|P:low-density lipoprotein particle clearance|IDA; GO:0070373|P:negative regulation of ERK1 and ERK2 cascade|IDA; GO:0034115|P:negative regulation of heterotypic cell-cell adhesion|IDA; GO:0045715|P:negative regulation of low-density lipoprotein particle receptor biosynthetic process|IDA; GO:001074…	MIM Number: 605441; Phenotype: Adiponectin deficiency, 612556 (3)	MP:0003631:nervous sys_phen|MP:0005390:skeleton phenotype|MP:0005367:renal/urinary sys_phen|MP:0005387:immune sys_phen|MP:0005386:behavior/neurological phenotype|MP:0005370:liver/biliary sys_phen|MP:0005388:respiratory sys_phen|MP:0005379:endocrine/exocrine gland phenotype|MP:0010768:mortality/aging|MP:0005378:growth/size/body region phenotype|MP:0005385:c-v sys_phen|MP:0005397:hematopoietic sys_…	MP:0003795:abnl bone struct|MP:0010123:incr bone mineral content|MP:0011967:incr or absent threshold for auditory brainstem resp|MP:0005565:incr BUN lvl|MP:0002965:incr circl serum albumin lvl|MP:0000194:incr circl Ca2+ lvl|MP:0002941:incr circl alanine transaminase lvl|MP:0002968:incr circl ALP lvl|MP:0005553:incr circl creatinine lvl|MP:0005343:incr circl AST lvl|MP:0003896:prolonged PR intvl	Adiponectin levels (http://www.ebi.ac.uk/efo/EFO_0004502):2e-22|Adiponectin levels (http://www.ebi.ac.uk/efo/EFO_0004502):5e-44|Adiponectin levels (http://www.ebi.ac.uk/efo/EFO_0004502):2e-42|Adiponectin levels (http://www.ebi.ac.uk/efo/EFO_0004502):3e-12|Adiponectin levels (http://www.ebi.ac.uk/efo/EFO_0004502):1e-41|Adiponectin levels (http://www.ebi.ac.uk/efo/EFO_0004502):1e-41|Blood protein l…	KEGG:Adipocytokine signaling pathway|KEGG:Longevity regulating pathway|KEGG:Type II diabetes mellitus|KEGG:Non-alcoholic fatty liver disease (NAFLD)|KEGG:AMPK signaling pathway|KEGG:PPAR signaling pathway|RxT:AMPK inhibits chREBP transcriptional activation activity|RxT:Developmental Biology|RxT:Integration of energy metabolism|RxT:Metabolism|RxT:Transcriptional regulation of white adipocyte diffe…	Obesity (ZScore: 7.958)|Diabetes mellitus (ZScore: 7.289)|Atherosclerosis (ZScore: 6.012)|Nonalcoholic fatty liver disease (ZScore: 5.917)|Lipid metabolism disorder (ZScore: 5.775)
P31751	RAC-beta serine/threonine-protein kinase (EC 2.7.11.1) (Protein kinase Akt-2) (Protein kinase B beta) (PKB beta) (RAC-PK-beta)	UniProtKB	AKT2	T2DNet	Tchem	AKT family	PC00167:non-receptor serine/threonine protein kinase|PC00219:transfer/carrier protein|PC00193:protein kinase|PC00131:intracellular calcium-sensing protein|PC00061:calmodulin|PC00060:calcium-binding protein|PC00050:annexin|PC00220:transferase|PC00137:kinase	Nucleus| Vesicles| Cytosol	GO:0005524|F:ATP binding|IDA; GO:0032869|P:cellular response to insulin stimulus|IMP; GO:0010748|P:negative regulation of plasma membrane long-chain fatty acid transport|IMP; GO:0046326|P:positive regulation of glucose import|IMP; GO:0045725|P:positive regulation of glycogen biosynthetic process|IMP; GO:0010918|P:positive regulation of mitochondrial membrane potential|IMP	MIM Number: 164731; Phenotype: Diabetes mellitus, type II, 125853 (3); Hypoinsulinemic hypoglycemia with hemihypertrophy, 240900 (3)	MP:0005378:growth/size/body region phenotype|MP:0005379:endocrine/exocrine gland phenotype|MP:0005375:adipose tissue phenotype|MP:0005384:cel_phen|MP:0005376:homeostasis/metabolism phenotype|MP:0005369:muscle phenotype|MP:0005389:reproductive sys_phen|MP:0010768:mortality/aging|MP:0002006:neoplasm|MP:0005370:liver/biliary sys_phen	MP:0005559:incr circl gluc lvl|MP:0002644:decr circl TG lvl|MP:0005632:decr circl AST lvl|MP:0002968:incr circl ALP lvl|MP:0001556:incr circl HDL cholest lvl|MP:0005560:decr circl gluc lvl|MP:0000194:incr circl Ca2+ lvl|MP:0002968:incr circl ALP lvl|MP:0008822:decr blood uric acid lvl|MP:0005633:incr circl Na+ lvl|MP:0001566:incr circl PO4- lvl|MP:0005565:incr BUN lvl|MP:0002702:decr circl free f…	Diastolic blood pressure (http://www.ebi.ac.uk/efo/EFO_0006336):8e-07|Diastolic blood pressure (http://www.ebi.ac.uk/efo/EFO_0006336):2e-09|Cerebrospinal T-tau levels (http://www.ebi.ac.uk/efo/EFO_0006794, http://www.ebi.ac.uk/efo/EFO_0004760):2e-07|Cerebrospinal fluid t-tau:AB1-42 ratio (http://www.ebi.ac.uk/efo/EFO_0007708):2e-06	KEGG:PI3K-Akt signaling pathway|KEGG:Central carbon metabolism in cancer|KEGG:Platinum drug resistance|KEGG:EGFR tyrosine kinase inhibitor resistance|KEGG:Endocrine resistance|KEGG:Non-small cell lung cancer|KEGG:Platelet activation|KEGG:Chronic myeloid leukemia|KEGG:Gastric cancer|KEGG:Focal adhesion|KEGG:mTOR signaling pathway|KEGG:GnRH secretion|KEGG:Relaxin signaling pathway|KEGG:Regulation o…	Cancer (ZScore: 4.920)|Diabetes mellitus (ZScore: 3.797)|Breast disease (ZScore: 3.515)|Ovarian disease (ZScore: 3.488)|Obesity (ZScore: 3.292)
Q86YR7	Probable guanine nucleotide exchange factor MCF2L2 (Dbs-related Rho family guanine nucleotide exchange factor) (MCF2-transforming sequence-like protein 2)	UniProtKB	MCF2L2	NotT2DNet	Tbio	Signaling	PC00207:signaling molecule	Cytosol| Plasma membrane					Adolescent idiopathic scoliosis (http://www.ebi.ac.uk/efo/EFO_0005423):3e-07|QT interval (http://www.ebi.ac.uk/efo/EFO_0004682):2e-06		Congenital myasthenic syndrome 5 (ZScore: 3.239)|Ectopic pregnancy (ZScore: 3.005)
Q6UXH0	Angiopoietin-like protein 8 (Betatrophin) (Lipasin) (Refeeding-induced fat and liver protein)	UniProtKB	ANGPTL8	T2DNet	Tbio			Golgi apparatus| Nucleoplasm		MIM Number: 616223	MP:0005378:growth/size/body region phenotype|MP:0005375:adipose tissue phenotype|MP:0005376:homeostasis/metabolism phenotype		HDL cholesterol (http://www.ebi.ac.uk/efo/EFO_0004612):3e-09|Triglyceride levels (http://www.ebi.ac.uk/efo/EFO_0004530):2e-13|Total cholesterol levels (http://www.ebi.ac.uk/efo/EFO_0004574):8e-32|Low density lipoprotein cholesterol levels (http://www.ebi.ac.uk/efo/EFO_0004611):2e-09|Triglycerides (http://www.ebi.ac.uk/efo/EFO_0004530):3e-14|HDL cholesterol (http://www.ebi.ac.uk/efo/EFO_0004612):1…	KEGG:Cholesterol metabolism|RxT:Assembly of active LPL and LIPC lipase complexes|RxT:Plasma lipoprotein assembly, remodeling, and clearance|RxT:Plasma lipoprotein remodeling|RxT:Transport of small molecules|W_P:Angiopoietin Like Protein 8 Regulatory Pathway	Diabetes mellitus (ZScore: 4.514)|Obesity (ZScore: 3.617)|Polycystic ovary syndrome (ZScore: 3.370)|Breast angiosarcoma (ZScore: 3.267)|Lipid metabolism disorder (ZScore: 3.084)
Q5VV42	Threonylcarbamoyladenosine tRNA methylthiotransferase (EC 2.8.4.5) (CDK5 regulatory subunit-associated protein 1-like 1) (tRNA-t(6)A37 methylthiotransferase)	UniProtKB	CDKAL1	T2DNet	Tbio			Vesicles	GO:0035598|F:N6-threonylcarbomyladenosine methylthiotransferase activity|EXP	MIM Number: 611259	MP:0005375:adipose tissue phenotype|MP:0005379:endocrine/exocrine gland phenotype|MP:0005378:growth/size/body region phenotype|MP:0010771:integument phenotype|MP:0005376:homeostasis/metabolism phenotype|MP:0005384:cel_phen|MP:0005391:vision/eye phenotype|MP:0005386:behavior/neurological phenotype|MP:0005370:liver/biliary sys_phen	MP:0000198:decr circl PO4- lvl|MP:0001303:abnl lens morphol|MP:0001303:abnl lens morphol|MP:0010053:decr grip strength|MP:0005292:improved gluc tolerance|MP:0010053:decr grip strength|MP:0002834:decr heart w-t|MP:0001303:abnl lens morphol|MP:0001303:abnl lens morphol|MP:0010378:incr respiratory quotient|MP:0001303:abnl lens morphol|MP:0001303:abnl lens morphol|MP:0001399:HyprAct|MP:0010169:decr C…	General cognitive ability (http://www.ebi.ac.uk/efo/EFO_0004337):1e-06|Type 2 diabetes (http://www.ebi.ac.uk/efo/EFO_0001360):6e-62|Intelligence (http://www.ebi.ac.uk/efo/EFO_0004337):4e-09|General cognitive ability (http://www.ebi.ac.uk/efo/EFO_0004337):1e-08|General cognitive ability (http://www.ebi.ac.uk/efo/EFO_0004337):1e-08|General cognitive ability (http://www.ebi.ac.uk/efo/EFO_0004337):6e…	RxT:Metabolism of RNA|RxT:tRNA modification in the nucleus and cytosol|RxT:tRNA processing|W_P:Vitamin D Receptor Pathway	Diabetes mellitus (ZScore: 5.200)|Podoconiosis (ZScore: 3.199)|Obesity (ZScore: 3.014)
Q9UQF2	C-Jun-amino-terminal kinase-interacting protein 1 (JIP-1) (JNK-interacting protein 1) (Islet-brain 1) (IB-1) (JNK MAP kinase scaffold protein 1) (Mitogen-activated protein kinase 8-interacting protein 1)	UniProtKB	MAPK8IP1	T2DNet	Tbio	Signaling	PC00207:signaling molecule	Plasma membrane	GO:0005078|F:MAP-kinase scaffold activity|IPI	MIM Number: 604641; Phenotype: {Diabetes mellitus, noninsulin-dependent}, 125853 (3)	MP:0010768:mortality/aging|MP:0005370:liver/biliary sys_phen|MP:0005386:behavior/neurological phenotype|MP:0003631:nervous sys_phen|MP:0005376:homeostasis/metabolism phenotype|MP:0005384:cel_phen		High density lipoprotein cholesterol levels (http://www.ebi.ac.uk/efo/EFO_0004612):3e-09	KEGG:MAPK signaling pathway|W_P:MAPK Signaling Pathway|W_P:MAPK Signaling Pathway|W_P:MAPK Signaling Pathway|W_P:Retinoblastoma Gene in Cancer|W_P:Focal Adhesion-PI3K-Akt-mTOR-signaling pathway|W_P:PI3K-Akt Signaling Pathway|W_P:Ras Signaling|W_P:Regulatory circuits of the STAT3 signaling pathway	Cervical cancer (ZScore: 7.596)|Carcinoma (ZScore: 5.027)|Vaginal cancer (ZScore: 3.413)|Adenocarcinoma in situ (ZScore: 3.280)|Hemometra (ZScore: 3.255)
P22413	Ectonucleotide pyrophosphatase/phosphodiesterase family member 1 (E-NPP 1) (Membrane component chromosome 6 surface marker 1) (Phosphodiesterase I/nucleotide pyrophosphatase 1) (Plasma-cell membrane glycoprotein PC-1) [Cleaved into: Ectonucleotide pyrophosphatase/phosphodiesterase family member 1, secreted form] [Includes: Alkaline phosphodiesterase I (EC 3.1.4.1); Nucleotide pyrophosphatase (NPP…	UniProtKB	ENPP1	T2DNet	Tchem	Nucleotide phosphatase	PC00196:pyrophosphatase|PC00121:hydrolase|PC00173:nucleotide phosphatase|PC00181:phosphatase	Plasma membrane	GO:0005524|F:ATP binding|IDA; GO:0005158|F:insulin receptor binding|IDA; GO:0004528|F:phosphodiesterase I activity|IDA; GO:0042803|F:protein homodimerization activity|IDA; GO:0030643|P:cellular phosphate ion homeostasis|IDA; GO:0032869|P:cellular response to insulin stimulus|IDA; GO:0030505|P:inorganic diphosphate transport|IDA; GO:0046325|P:negative regulation of glucose import|IDA; GO:0045719|P…	MIM Number: 173335; Phenotype: {Diabetes mellitus, non-insulin-dependent, susceptibility to}, 125853 (3); {Obesity, susceptibility to}, 601665 (3); Arterial calcification, generalized, of infancy, 1, 208000 (3); Hypophosphatemic rickets, autosomal recessive, 2, 613312 (3); Cole disease, 615522 (3)	MP:0005369:muscle phenotype|MP:0005382:craniofacial phenotype|MP:0005384:cel_phen|MP:0005376:homeostasis/metabolism phenotype|MP:0010771:integument phenotype|MP:0010768:mortality/aging|MP:0005378:growth/size/body region phenotype|MP:0005385:c-v sys_phen|MP:0005375:adipose tissue phenotype|MP:0005371:limbs/digits/tail phenotype|MP:0005377:hearing/vestibular/ear phenotype|MP:0003631:nervous sys_phe…			KEGG:Pyrimidine metabolism|KEGG:Nicotinate and nicotinamide metabolism|KEGG:Starch and sucrose metabolism|KEGG:Pantothenate and CoA biosynthesis|KEGG:Riboflavin metabolism|KEGG:Metabolic pathways|KEGG:Purine metabolism|PathC: inoh:Nicotinate and Nicotinamide metabolism ( Nicotinate and Nicotinamide metabolism )|PathC: humancyc:NAD salvage pathway II|RxT:Metabolism|RxT:Metabolism of vitamins and c…	Arterial calcification of infancy (ZScore: 7.385)|Pseudoxanthoma elasticum (ZScore: 5.074)|Ankylosis (ZScore: 4.858)|Rickets (ZScore: 4.698)|Hypophosphatasia (ZScore: 4.353)
